# Supplementary material
Source: publisher site journal article supplement (https://www.dovepress.com/article/483459)
Supplement: Supplementary file 1 [file get_supplementary_file.php]

Supplementary Table S1 Baseline patients characteristics for Type 2 cohort population

| **Characteristics** | **Base Cohort (Baseline Value)** |
| --- | --- |
| Demographics | |
| Mean Age (Years) | 64.5±12.2 [1] |
| Duration of Diabetes (Years) | 16±8.8 [1] |
| Proportion Male (%) | 50.5 [1] |
| Risk Factors | |
| Glycated Hemoglobin (HbA1c, %) | 8.3±1.6 [1] |
| Body Mass Index (kg/m2) | 33.4±7.5 [1] |
| Systolic Blood Pressure (mmHg) | 130.7±15.7 [1] |
| Diastolic Blood Pressure (mmHg) | 69.5±11.2 [1] |
| Total Cholesterol (mg/dL) | 156.5±43.1 [1] |
| High Density Lipoprotein Cholesterol (mg/dL) | 44.6±12.2 [1] |
| Low Density Lipoprotein Cholesterol (mg/dL) | 81.4±33.3 [1] |
| Triglycerides (mg/dL) | 170.6±136.7 [1] |
| Heart Rate (beats/min) | 72±0 [2,3] |
| Smoking Status (%) | 5.9% [1] |
| Estimated Glomerular Filtration Rate (ml/min/1.73m2) | 72.8±26.6 [1] |
| Hemoglobin (g/dl) | 14 [3] |
| Waist to Hip Ratio (WHR) | 0.93 [3] |
| White Blood Cells in 10^6/ml | 6.8 [3] |
| Urinary Albumin to Creatinine Ratio (uACR), mg/mmol | 3.1 [3] |
| Serum Creatinine (mg/dl) | 1.1 [3] |
| Serum Albumin (g/dl) | 3.9 |
| Racial/Ethnic Group (%) | |
| White | 43 [1] |
| Black | 10.5 [1] |
| Hispanics | 21.6 [1] |
| Native American | 7 [1] |
| Asian | 17.9 [1] |
| Cardiovascular Disease | |
| Angina Pectoris | 11.6% [1] |
| Myocardial Infarction | 5.1% [1] |
| Congestive Heart Failure | 14.0% [1] |
| Stroke | 3.7% [1] |
| Peripheral Vascular Disease | 14.6% [1] |
| Atrial Fibrillation | 5.1% [3] |
| Left Ventricular Hypertrophy (LVH) Detected by ECG | 4.2% [3] |
| Renal Disease | |
| Microalbuminuria | 54.7% [1] |
| Gross Proteinuria | 10.0% [1] |
| End-stage Renal Disease | 2.2% [1] |
| Retinopathy | |
| Background Diabetic Retinopathy | 33.1% [3] |
| Proliferative Diabetic Retinopathy | 9.2% [1] |
| Severe Vision Loss | 3.0% [3] |
| Neuropathy/ Foot Ulcer Complications | |
| Peripheral Neuropathy | 45.0% [1] |
| Healed Ulcer | 10.0% [1] |
| Amputation | 3.3% [1] |
| Other Eye Complications | |
| Macular Edema | 9.0% [1] |
| Cataract | 11.0% [1] |
| Patient Management of type 2 Diabetes | |
| Taking Angiotensin-converting Enzyme Inhibitor/Angiotensin-II Receptor Blocker: Primary Prevention | 21.3% [4] |
| Taking Angiotensin-converting Enzyme Inhibitor/Angiotensin-II Receptor Blocker: Secondary Prevention | 75.5% [4] |
| Taking Statins: Primary Prevention | 47.4% [4] |
| Taking Statins: Secondary Prevention | 84.0% [4] |
| Taking Aspirin: Primary Prevention | 59.0% [4] |
| Taking Aspirin: Secondary Prevention | 88.7% [4] |
| Screened for Eye Disease | 100.0% [4] |
| Renal Disease | 100.0% [4] |

Supplementary Table S2 Cost per Diabetes Complication or Event, Adjusted to EUR 2022

|  | **Adjusted Diabetes Complication Costs (Euro 2022)** | **Reference** |
| --- | --- | --- |
| **Description of Event or State** |
| Myocardial Infarction, Year of Event | 7,415.13 | [5] |
| Myocardial Infarction, each Subsequent Year | 1,043.07 | [5] |
| Angina, Year of Event | 4,165.12 | [5] |
| Angina, Each Subsequent Year | 382.84 | [5] |
| Congestive Heart Failure, Year of Onset | 4,622.68 | [5] |
| Congestive Heart Failure, Each Subsequent Year | 233.39 | [5] |
| Stroke, Year of Event | 7,350.64 | [5] |
| Stroke, each Subsequent Year | 659.21 | [5] |
| Stroke death within 30 days | 3,993.16 | [5] |
| Peripheral Vascular Disease, Year of Event | 6,981.11 | [5] |
| Peripheral Vascular Disease, each Subsequent Year | 6,981.11 | [5] |
| Hemodialysis, 1st Year | 43,061.80 | [5] |
| Hemodialysis, each Subsequent Year | 43,258.33 | [5] |
| Peritoneal Dialysis, 1st Year | 21,298.54 | [5] |
| Peritoneal Dialysis, each Subsequent Year | 21,073.34 | [5] |
| Renal transplant, Year of Event | 25,008.15 | [5] |
| Renal transplant, Each Subsequent Year | 5,547.02 | [5] |
| LASER Treatment | 237.48 | [5] |
| Severe Vision Loss/Blindness, Year of Event | 3,130.24 | [5] |
| Severe Vision Loss/Blindness, Subsequent Year | 104.41 | [5] |
| Cataract Extraction | 3,788.43 | [5] |
| Cataract Treatment Each Subsequent Year | 104.41 | [5] |
| Neuropathy, 1st Year | 6,430.40 | [5] |
| Neuropathy, Each Subsequent Year | 6,430.40 | [5] |
| Infected foot ulcer | 7,344.50 | [5] |
| Amputation, Year of Event | 8,934.19 | [5] |
| Amputation, Prosthesis | 7,918.75 | [5] |
| Severe hypoglycemic event requiring medical assistance (SHE2) | 1,124.96 | [5] |
| Severe hyperglycemic event (DKA) | 2,719.73 | [6] |
| Costs of Screening For Retinopathy | 102.97 | [7] |
| Costs of Screening For Microalbuminuria | 3.72 | [7] |
| Costs of Screening For Gross Proteinuria | 3.72 | [7] |
| *Adjusted to Euro 2022 through the website:  <https://fred.stlouisfed.org/series/CP0600ESM086NEST>  https://www.ons.gov.uk/economy/inflationandpriceindices/timeseries/d7bz/mm23 | |  |

**Supplementary Table S3 Annual Costs for rt-CGM and SMBG in type 2 Diabetes for Spain**

|  | **Unit Cost** | **Units** | **Net Cost** |
| --- | --- | --- | --- |
| **RT-CGM annual cost (current reimbursed price in Spain)**  Total annual cost/patient for RT-CGM (includes 36 sensors and 4 transmitters) | € 1,100 | 1 | € 1,100 |
| **SMBG annual cost (**Single-use blood glucose test strip. Testing assumed to be 3.8 times per day*) | €0.29 per test | 1,387 | € 402.23 |
| *Assumptions regarding testing frequency sourced from the DIAMOND trial [8]. | | | |

Supplementary Table S4 Baseline Utility and Diabetes Complication Disutility Values Used in the Comparison between rt-CGM and SMBG

| **Event/State** | **Utility/Disutility** | **Reference** |
| --- | --- | --- |
| T2D, no complication | 0.785±0.007 | [9] |
| Angina disutility, year of event | -0.09±0.01 | [9] |
| Congestive heart failure disutility, year of event | -0.108±0.01 | [9] |
| Myocardial infarction disutility, year of event | -0.055±0.01 | [9] |
| Stroke disutility, year of event | -0.164±0.01 | [9] |
| Peripheral vascular disease disutility, year of event | -0.061±0.01 | [9] |
| Gross proteinuria disutility, year of event | -0.048±0.01 | [9] |
| Hemodialysis disutility, year of event | -0.164±0.03 | [9] |
| Peritoneal dialysis disutility, year of event | -0.204±0.03 | [9] |
| Kidney transplant disutility, year of event | -0.023±0.12 | [9] |
| Background diabetic retinopathy disutility, year of event | -0.04±0.02 | [9] |
| Proliferative diabetic retinopathy disutility, year of event | -0.07±0.02 | [9] |
| Cataract disutility, year of event | -0.016±0.02 | [9] |
| Macular edema disutility, year of event | -0.04±0.02 | [9] |
| Severe vision loss/blindness disutility, year of event | -0.074±0.01 | [9] |
| Neuropathy disutility, year of event | -0.084±0.01 | [9] |
| Active foot ulcer disutility, year of event | -0.17±0.02 | [9] |
| Amputation disutility, year of event | -0.28±0.01 | [9] |
| Ketoacidosis disutility, year of event | -0.0367±0.0 | [10] |
| Diurnal severe hypoglycemia event (SHE1 and SHE2) requiring   any 3rd party medical assistance | -0.060±0.0 | [9] |
| Nocturnal severe hypoglycemia event (SHE1 and SHE2) requiring   any 3rd party medical assistance | -0.060±0.00 | [9] |

**References**

[1] Karter AJ, Parker MM, Moffet HH, et al. Association of real-time continuous glucose monitoring with glycemic control and acute metabolic events among patients with insulin-treated diabetes. JAMA. 2021;325:2273–2284.

[2] ACCORD Study Group, Buse JB, Bigger JT, et al. Action to Control Cardiovascular Risk in Diabetes (ACCORD) trial: design and methods. Am J Cardiol. 2007;99:21i–33i.

[3] ACCORD Study Group, Gerstein HC, Miller ME, et al. Effects of intensive glucose lowering in type 2 diabetes. N Engl J Med. 2008;358:2545–2559.

[4] NICE. Type 2 diabetes in adults: management [Internet]. London: NICE; 2015 [cited 2023 Dec 7]. Report No.: NG28. Available from: https://www.nice.org.uk/guidance/ng28.

[5] Franch-Nadal J, Malkin SJP, Hunt B, et al. The cost-effectiveness of oral semaglutide in Spain: a long-term health economic analysis based on the PIONEER clinical trials. Adv Ther. 2022;39:3180–3198.

[6] Crespo C, Brosa M, Soria-Juan A, et al. Costes directos de la diabetes mellitus y de sus complicaciones en España (Estudio SECCAID: Spain estimated cost Ciberdem-Cabimer in Diabetes). Av En Diabetol. 2013;29:182–189.

[7] eSalud 2018 Cost of procedures according to official tariffs. 2018.

[8] Beck RW, Riddlesworth TD, Ruedy K, et al. Continuous glucose monitoring versus usual care in patients with type 2 diabetes receiving multiple daily insulin injections: a randomized trial. Ann Intern Med. 2017;167:365–374.

[9] Beaudet A, Clegg J, Thuresson P-O, et al. Review of utility values for economic modeling in type 2 diabetes. Value Health. 2014;17:462–470.

[10] Zhao X, Ming J, Qu S, et al. Cost-effectiveness of flash glucose monitoring for the management of patients with type 1 and patients with type 2 diabetes in China. Diabetes Ther. 2021;12:3079–3092.
